# Supplementary material
Source: publisher figshare collection journal article supplement (https://acs.figshare.com/ndownloader/files/4300126)
Supplement: Supplementary file 1 [file 4300126]

data_I  
_audit_creation_method             'MoPro'     
_chemical_name_systematic            ? 
_chemical_name_common                ? 
_chemical_formula_moiety             'C6 H10 N2 O2'
_chemical_formula_sum                'C6 H10 N2 O2'
_chemical_formula_weight             142.150
_chemical_absolute_configuration     '-'

_symmetry_cell_setting               triclinic    
_symmetry_space_group_name_H-M       'P -1'
_symmetry_space_group_name_Hall      '-P 1'

loop_
_atom_type_symbol                      
_atom_type_description                 
_atom_type_scat_dispersion_real        
_atom_type_scat_dispersion_imag        
_atom_type_scat_source                 
 'C' 'C'  0.003 0.002
'Clementi & Roetti 1974. Atomic Data & Nuclear Data Tables. 14, 177'  
 'H' 'H'  0.000 0.000
'Clementi & Roetti 1974. Atomic Data & Nuclear Data Tables. 14, 177'  
 'N' 'N'  0.007 0.003
'Clementi & Roetti 1974. Atomic Data & Nuclear Data Tables. 14, 177'  
 'O' 'O'  0.011 0.006
'Clementi & Roetti 1974. Atomic Data & Nuclear Data Tables. 14, 177'  

loop_
_symmetry_equiv_pos_as_xyz           
'x, y, z'
'-x, -y, -z'
_cell_length_a                6.3530(2) 
_cell_length_b                6.5278(2) 
_cell_length_c                8.3716(2) 
_cell_angle_alpha             80.297(1) 
_cell_angle_beta              78.226(1) 
_cell_angle_gamma             89.048(1) 
_cell_volume                   337.956(17) 
_cell_formula_units_Z                2
_cell_measurement_temperature        ?
_cell_measurement_reflns_used        ?
_cell_measurement_theta_min          ?
_cell_measurement_theta_max          ?
_exptl_crystal_description           ? 
_exptl_crystal_colour                ? 
_exptl_crystal_size_max              ? 
_exptl_crystal_size_mid              ? 
_exptl_crystal_size_min              ? 
_exptl_crystal_density_meas          ? 
_exptl_crystal_density_diffrn       1.401
_exptl_crystal_density_method       'not measured' 
_exptl_crystal_F_000                 152
_exptl_absorpt_coefficient_mu        ?  
_exptl_absorpt_correction_type       ?  
_exptl_absorpt_correction_T_min      ?  
_exptl_absorpt_correction_T_max      ?  
_exptl_special_details               
;
?
;
_diffrn_ambient_temperature          ?  
_diffrn_radiation_wavelength        0.71073
_diffrn_radiation_type              MoK\a 
_diffrn_radiation_source          'fine-focus sealed tube' 
_diffrn_radiation_monochromator      ? 
_diffrn_measurement_device_type      ? 
_diffrn_measurement_method           ? 
_diffrn_detector_area_resol_mean     ? 
_diffrn_standards_number             ? 
_diffrn_standards_interval_count     ? 
_diffrn_standards_interval_time      ? 
_diffrn_standards_decay_%            ? 
_diffrn_reflns_number                ? 
_diffrn_reflns_av_R_equivalents      ? 
_diffrn_reflns_av_sigmaI/netI        0.05454
_diffrn_reflns_limit_h_min         -13
_diffrn_reflns_limit_h_max          13
_diffrn_reflns_limit_k_min         -14
_diffrn_reflns_limit_k_max          14
_diffrn_reflns_limit_l_min           0
_diffrn_reflns_limit_l_max          18
_diffrn_reflns_theta_min            2.51
_diffrn_reflns_theta_max           51.84
_reflns_number_total                  5697
_reflns_number_gt                     4620
_reflns_threshold_expression         >2.0sigma(I)
_computing_data_collection           ? 
_computing_cell_refinement           ? 
_computing_data_reduction            ? 
_computing_structure_solution        ? 
_computing_structure_refinement      'MoPro (J. Appl. Cryst. 2005, 38, 38-54)'
_computing_molecular_graphics        ? 
_computing_publication_material      ? 
_refine_special_details              
;
;
_refine_ls_structure_factor_coef     F  
_refine_ls_matrix_type                full
_refine_ls_weighting_scheme          sigma
_refine_ls_weighting_details         ?
_atom_sites_solution_primary      direct 
_atom_sites_solution_secondary    difmap 
_atom_sites_solution_hydrogens    geom   
_refine_ls_hydrogen_treatment     constr 
_refine_ls_extinction_method        'none'              
_refine_ls_abs_structure_details     ?
_refine_ls_abs_structure_Flack       ?
_refine_ls_number_reflns              5697
_refine_ls_number_parameters           121
_refine_ls_number_restraints            26
_refine_ls_R_factor_all              0.0370
_refine_ls_R_factor_gt               0.0258
_refine_ls_wR_factor_ref             0.0242
_refine_ls_wR_factor_gt              0.0227
_refine_ls_goodness_of_fit_ref       0.981
_refine_ls_restrained_S_all          3.247
_refine_ls_shift/su_max              0.000
_refine_ls_shift/su_mean             0.000

loop_
_atom_site_type_symbol      
_atom_site_label            
_atom_site_fract_x          
_atom_site_fract_y          
_atom_site_fract_z          
_atom_site_U_iso_or_equiv   
_atom_site_adp_type         
_atom_site_occupancy        
_atom_site_calc_flag        
_atom_site_refinement_flags_posn  
_atom_site_refinement_flags_adp
_atom_site_disorder_assembly
_atom_site_disorder_group   
C  C1 0.56748(5) 0.62783(4) 0.16496(3) 0.01085(4) Uani 1 d . .    . .
C  C2 0.66533(5) 0.43616(4) 0.24754(4) 0.01458(4) Uani 1 d . .    . .
C  C3 0.48763(5) 0.26873(4) 0.28777(4) 0.01540(4) Uani 1 d . .    . .
C  C4 0.27967(5) 0.39131(4) 0.28333(4) 0.01396(4) Uani 1 d . .    . .
C  C5 0.20719(5) 0.75580(4) 0.15000(3) 0.01138(4) Uani 1 d . .    . .
C  C6 0.11367(4) 0.84603(4) 0.30582(3) 0.01068(4) Uani 1 d . .    . .
O  O1 0.66406(4) 0.79147(3) 0.09479(3) 0.01513(4) Uani 1 d . .    . .
O  O2 0.21682(4) 0.84061(4) 0.41665(3) 0.01487(4) Uani 1 d . .    . .
N  N1 0.35463(4) 0.59173(3) 0.18201(3) 0.01057(3) Uani 1 d . .    . .
N  N2 -0.07755(4) 0.93579(4) 0.30826(3) 0.01411(4) Uani 1 d . .    . .
H  H21 0.7102(9) 0.4703(7) 0.3602(4) 0.03242 Uani 1 d D U    . .
H  H22 0.8092(6) 0.3955(7) 0.1665(6) 0.02928 Uani 1 d D U    . .
H  H31 0.4829(7) 0.1746(8) 0.4086(4) 0.03429 Uani 1 d D U    . .
H  H32 0.5099(7) 0.1696(7) 0.1925(5) 0.02900 Uani 1 d D U    . .
H  H41 0.1955(9) 0.4158(9) 0.4060(4) 0.02858 Uani 1 d D U    . .
H  H42 0.1688(8) 0.3186(8) 0.2252(7) 0.02818 Uani 1 d D U    . .
H  H51 0.2962(9) 0.8811(6) 0.0609(6) 0.02484 Uani 1 d D U    . .
H  H52 0.0778(6) 0.7002(9) 0.0987(7) 0.02214 Uani 1 d D U    . .
H  H1 -0.138(1) 1.0085(9) 0.4031(5) 0.02521 Uani 1 d D U    . .
H  H2 -0.1618(9) 0.913(1) 0.2225(6) 0.02546 Uani 1 d D U    . .

loop_ 
_atom_site_aniso_label 
_atom_site_aniso_U_11 
_atom_site_aniso_U_22 
_atom_site_aniso_U_33 
_atom_site_aniso_U_12 
_atom_site_aniso_U_13 
_atom_site_aniso_U_23 
C1 0.01094(9) 0.01032(7) 0.01152(9) -0.00089(6) -0.00339(8) -0.00103(7)  
C2 0.0128(1) 0.01302(8) 0.0181(1) 0.00076(7) -0.00574(9) -0.00030(8)  
C3 0.0154(1) 0.01017(8) 0.0200(1) 0.00091(7) -0.00404(10) -0.00022(8)  
C4 0.0124(1) 0.01072(8) 0.0174(1) -0.00076(7) -0.00114(9) -0.00069(8)  
C5 0.01197(10) 0.01148(7) 0.01114(9) 0.00173(6) -0.00316(8) -0.00235(7)  
C6 0.01107(10) 0.01017(7) 0.01158(9) 0.00126(6) -0.00325(8) -0.00298(7)  
O1 0.01430(9) 0.01324(7) 0.01723(9) -0.00394(6) -0.00516(7) 0.00193(6)  
O2 0.01560(9) 0.01770(8) 0.01410(8) 0.00430(6) -0.00670(7) -0.00647(7)  
N1 0.00983(8) 0.00924(6) 0.01223(8) 0.00029(5) -0.00165(7) -0.00145(6)  
N2 0.01235(10) 0.01608(8) 0.01577(10) 0.00415(7) -0.00462(8) -0.00620(7)  
H21 0.0402 0.0276 0.0297 0.0008 -0.0179 0.0076  
H22 0.0354 0.0195 0.0304 0.0052 -0.0019 -0.0033  
H31 0.0336 0.0324 0.0319 -0.0018 -0.0057 0.0079  
H32 0.0203 0.0260 0.0422 0.0020 -0.0018 -0.0160  
H41 0.0352 0.0162 0.0264 0.0024 0.0051 0.0046  
H42 0.0305 0.0174 0.0350 -0.0031 -0.0044 -0.0023  
H51 0.0307 0.0195 0.0216 0.0036 -0.0011 -0.0013  
H52 0.0218 0.0215 0.0258 0.0019 -0.0067 -0.0094  
H1 0.0284 0.0217 0.0274 0.0076 -0.0067 -0.0088  
H2 0.0285 0.0229 0.0235 -0.0018 -0.0055 0.0007  

_geom_special_details                
;                                    
;                                    

loop_
_geom_bond_atom_site_label_1         
_geom_bond_atom_site_label_2         
_geom_bond_distance                  
_geom_bond_site_symmetry_2           
_geom_bond_publ_flag                 
C1 O1 1.2334(4) . ? 
C1 N1 1.3603(4) . ? 
C1 C2 1.5125(5) . ? 
C2 C3 1.5329(5) . ? 
C2 H22 1.085(2) . ? 
C2 H21 1.101(2) . ? 
C3 C4 1.5442(5) . ? 
C3 H31 1.088(2) . ? 
C3 H32 1.095(2) . ? 
C4 N1 1.4596(4) . ? 
C4 H42 1.093(2) . ? 
C4 H41 1.097(2) . ? 
C5 N1 1.4407(4) . ? 
C5 C6 1.5305(5) . ? 
C5 H51 1.088(2) . ? 
C5 H52 1.100(2) . ? 
C6 O2 1.2424(4) . ? 
C6 N2 1.3453(4) . ? 
N2 H1 1.001(2) . ? 
N2 H2 1.015(2) . ? 

loop_
_geom_angle_atom_site_label_1        
_geom_angle_atom_site_label_2        
_geom_angle_atom_site_label_3        
_geom_angle                          
_geom_angle_site_symmetry_1          
_geom_angle_site_symmetry_3          
_geom_angle_publ_flag                
C1 N1 C5 122.78(3) . . ? 
C1 N1 C4 113.59(3) . . ? 
C1 C2 C3 104.32(2) . . ? 
C1 C2 H22 110.3(3) . . ? 
C1 C2 H21 109.1(3) . . ? 
C2 C1 O1 125.69(3) . . ? 
C2 C1 N1 108.99(3) . . ? 
C2 C3 C4 104.97(3) . . ? 
C2 C3 H31 110.9(3) . . ? 
C2 C3 H32 110.3(3) . . ? 
C3 C4 N1 103.22(2) . . ? 
C3 C4 H42 113.1(3) . . ? 
C3 C4 H41 112.8(3) . . ? 
C3 C2 H22 113.7(3) . . ? 
C3 C2 H21 111.5(3) . . ? 
C4 N1 C5 120.90(2) . . ? 
C4 C3 H31 111.2(3) . . ? 
C4 C3 H32 108.8(3) . . ? 
C5 C6 O2 120.19(3) . . ? 
C5 C6 N2 115.47(3) . . ? 
C6 N2 H1 118.0(4) . . ? 
C6 N2 H2 119.0(4) . . ? 
C6 C5 N1 111.51(2) . . ? 
C6 C5 H51 107.3(3) . . ? 
C6 C5 H52 110.0(3) . . ? 
O1 C1 N1 125.31(3) . . ? 
O2 C6 N2 124.29(4) . . ? 
N1 C5 H51 107.5(3) . . ? 
N1 C5 H52 111.1(3) . . ? 
N1 C4 H42 109.1(3) . . ? 
N1 C4 H41 109.7(3) . . ? 
H21 C2 H22 107.8(5) . . ? 
H31 C3 H32 110.4(5) . . ? 
H41 C4 H42 108.7(5) . . ? 
H51 C5 H52 109.2(5) . . ? 
H1 N2 H2 122.6(6) . . ? 

loop_
_geom_torsion_atom_site_label_1      
_geom_torsion_atom_site_label_2      
_geom_torsion_atom_site_label_3      
_geom_torsion_atom_site_label_4      
_geom_torsion                        
_geom_torsion_site_symmetry_1        
_geom_torsion_site_symmetry_2        
_geom_torsion_site_symmetry_3        
_geom_torsion_site_symmetry_4        
_geom_torsion_publ_flag              
C1 N1 C5 C6 -90.77(2) . . . . ? 
C1 N1 C5 H51 26.6(3) . . . . ? 
C1 N1 C5 H52 146.1(3) . . . . ? 
C1 N1 C4 C3 -16.91(2) . . . . ? 
C1 N1 C4 H42 -137.4(3) . . . . ? 
C1 N1 C4 H41 103.5(4) . . . . ? 
C1 C2 C3 C4 -19.57(2) . . . . ? 
C1 C2 C3 H31 -139.8(3) . . . . ? 
C1 C2 C3 H32 97.5(3) . . . . ? 
C2 C1 N1 C5 165.95(2) . . . . ? 
C2 C1 N1 C4 4.55(2) . . . . ? 
C2 C3 C4 N1 21.84(2) . . . . ? 
C2 C3 C4 H42 139.6(3) . . . . ? 
C2 C3 C4 H41 -96.5(3) . . . . ? 
C3 C4 N1 C5 -178.69(2) . . . . ? 
C3 C2 C1 O1 -170.65(3) . . . . ? 
C3 C2 C1 N1 10.01(2) . . . . ? 
C4 N1 C1 O1 -174.79(3) . . . . ? 
C4 N1 C5 C6 69.32(2) . . . . ? 
C4 N1 C5 H51 -173.3(2) . . . . ? 
C4 N1 C5 H52 -53.8(3) . . . . ? 
C4 C3 C2 H22 -139.7(3) . . . . ? 
C4 C3 C2 H21 98.1(3) . . . . ? 
C5 N1 C1 O1 -13.39(3) . . . . ? 
C5 N1 C4 H42 60.8(3) . . . . ? 
C5 N1 C4 H41 -58.2(3) . . . . ? 
C5 C6 N2 H1 -174.4(2) . . . . ? 
C5 C6 N2 H2 12.8(4) . . . . ? 
O1 C1 C2 H22 -48.2(2) . . . . ? 
O1 C1 C2 H21 70.1(2) . . . . ? 
O2 C6 N2 H1 2.8(4) . . . . ? 
O2 C6 N2 H2 -170.0(3) . . . . ? 
O2 C6 C5 N1 27.53(2) . . . . ? 
O2 C6 C5 H51 -90.0(3) . . . . ? 
O2 C6 C5 H52 151.3(3) . . . . ? 
N1 C1 C2 H22 132.5(3) . . . . ? 
N1 C1 C2 H21 -109.3(3) . . . . ? 
N1 C5 C6 N2 -155.16(2) . . . . ? 
N1 C4 C3 H31 141.9(3) . . . . ? 
N1 C4 C3 H32 -96.3(3) . . . . ? 
N2 C6 C5 H51 87.3(3) . . . . ? 
N2 C6 C5 H52 -31.4(3) . . . . ? 
H21 C2 C3 H31 -22.2(4) . . . . ? 
H21 C2 C3 H32 -144.9(4) . . . . ? 
H22 C2 C3 H31 100.0(4) . . . . ? 
H22 C2 C3 H32 -22.7(4) . . . . ? 
H31 C3 C4 H42 -100.4(4) . . . . ? 
H31 C3 C4 H41 23.6(4) . . . . ? 
H32 C3 C4 H42 21.5(4) . . . . ? 
H32 C3 C4 H41 145.4(4) . . . . ? 

loop_
_geom_hbond_atom_site_label_D        
_geom_hbond_atom_site_label_H        
_geom_hbond_atom_site_label_A        
_geom_hbond_distance_DH              
_geom_hbond_distance_HA              
_geom_hbond_distance_DA              
_geom_hbond_angle_DHA                
_geom_hbond_site_symmetry_A          
N2 H2 O1 1.015(2) 1.954(3) 2.9425(4) 164.1(3)  1_455   
C5 H51 O1 1.088(2) 2.477(6) 2.8721(4) 99.9(2)  1_555   
N2 H1 O2 1.001(2) 1.919(2) 2.9146(3) 172.6(2)  3_576   
C2 H21 O2 1.101(2) 2.621(4) 3.2984(4) 119.0(2)  3_666   
C3 H31 O2 1.088(2) 2.637(4) 3.3958(4) 126.2(3)  3_666   
C5 H51 O1 1.088(2) 2.291(3) 3.3032(3) 154.0(3)  3_675   

_diffrn_measured_fraction_theta_max     0.746
_diffrn_reflns_theta_full              33.972
_diffrn_measured_fraction_theta_full    0.962
_refine_diff_density_max                0.24
_refine_diff_density_min               -0.23
_refine_diff_density_rms                0.057

loop_
_publ_author_name      
_publ_author_address   
,'?'  
; ? 
;  

_publ_requested_journal          '?' 
_publ_contact_author                ? 
_publ_contact_author_phone        '?' 
_publ_contact_author_fax          '?' 
_publ_contact_author_email        '?' 
_publ_section_title 
;  
 ?  
;  
_publ_section_comment  
;  
 ?  
;  
_publ_section_references 
;  
 ?  
;  
